# Supplementary material for: Probing the local structure of FLiBe melts and solidified salts by in situ high-temperature NMR
Source: Royal Society of Chemistry journal article supplement (doi:10.1039/d3cp01096a), 2023-01-01

## Supporting Information

# Probing the Local Structure of FLiBe Melts and Solidified Salt by in-situ High-temperature NMR

Xiaobin Fu<sup>1,3</sup>, Yiyang Liu<sup>1,3</sup>, Hailong Huang<sup>1</sup>, Huiyan Wu<sup>1,2</sup>, Jianchao Sun<sup>1,2</sup>, Ling

Han<sup>1,2</sup>, Min Ge<sup>1</sup>, Yuan Qian<sup>1\*</sup>, Hongtao Liu<sup>1\*</sup>

<sup>1</sup> Department of Molten Salt Chemistry and Engineering, Shanghai Institute of Applied Physics, Chinese Academy of Sciences.

<sup>2</sup> University of Chinese Academy of Sciences, Beijing, 100049, China.

<sup>3</sup> These authors contributed equally: Xiaobin Fu, Yiyang Liu

### Corresponding Author

[qianyuan@sinap.ac.cn](mailto:qianyuan@sinap.ac.cn);

[liuhongtao@sinap.ac.cn](mailto:liuhongtao@sinap.ac.cn);

**Figure S1.**  $^9\text{Be}$  HT-NMR spectra of LiF-BeF<sub>2</sub> molten salts with different BeF<sub>2</sub> concentration.

**Figure S2.** Solid-state  $^{19}\text{F}$  MAS NMR spectra and the signal intensity of FLiBe eutectic salts with different BeF<sub>2</sub> concentration.

**Figure S3.** XRD patterns of FLiBe eutectic salts with different BeF<sub>2</sub> concentration at room temperature.

**Figure S4.** Solid-state  $^7\text{Li}$  MAS NMR spectra of FLiBe eutectic salts with different BeF<sub>2</sub> concentration.

**Figure S5.** Calculated LiF-BeF<sub>2</sub> phase diagram. (J. Mol. Liq. 299, 112165 (2020).)

**Figure S6.** Illustration of the laser-heating high-temperature NMR system.

**Figure S7.** High-temperature  $^{19}\text{F}$  NMR signal simulations and the calculated average chemical shifts.

**Figure S8.** High-temperature  $^9\text{Be}$  NMR signal simulations and the calculated average chemical shifts.

**Figure S9.** DFT calculation results of  $^{19}\text{F}$  and  $^9\text{Be}$  NMR chemical shifts of different Be-F species.

**Figure S10.** Calculated  $^{19}\text{F}$  and  $^9\text{Be}$  NMR chemical shift evolution plots.

**Table S1.** Simulated  $^{19}\text{F}$  NMR signal chemical shifts.

**Table S2.** Simulated  $^{19}\text{F}$  NMR signal integrals.

**Table S3.** Calculated  $^{19}\text{F}$  NMR signal averaged chemical shifts.

**Table S4.** Simulated  $^9\text{Be}$  NMR signal chemical shifts.

**Table S5.** Simulated  $^9\text{Be}$  NMR signal integrals.

**Table S6.** Calculated  $^9\text{Be}$  NMR signal averaged chemical shifts.

**Figure S1.**  $^9\text{Be}$  HT-NMR spectra of LiF-BeF<sub>2</sub> molten salts with different BeF<sub>2</sub> concentration.

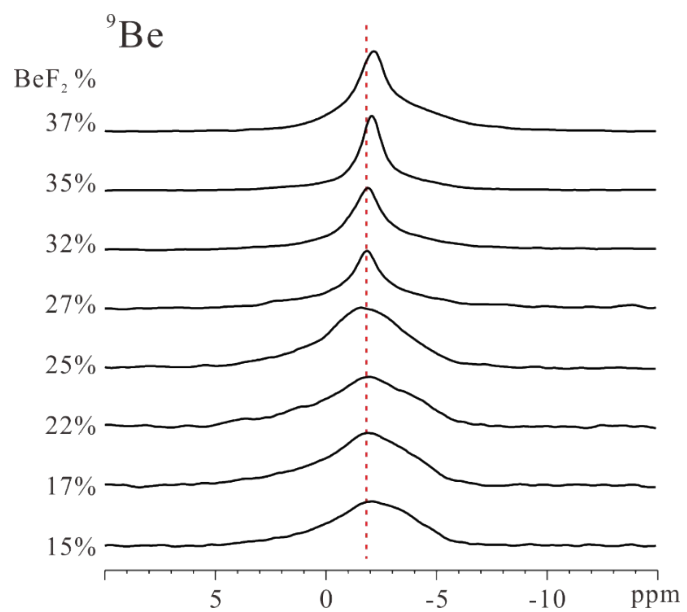

**Figure S2.** Solid-state  $^{19}\text{F}$  MAS NMR spectra and the signal intensity of FLiBe eutectic salts with different  $\text{BeF}_2$  concentration.

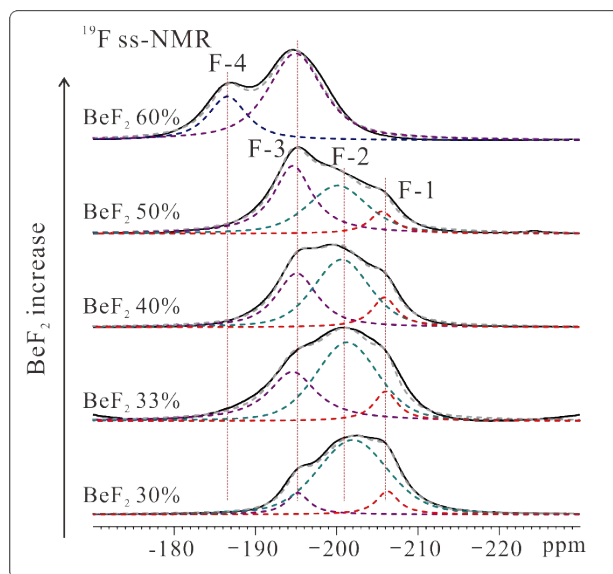

| $\text{BeF}_2$ concentration | F-1   | F-2   | F-3   | F-4  |
|------------------------------|-------|-------|-------|------|
| 30%                          | 10.5  | 79.5  | 9.9   | 0    |
| 33%                          | 10.55 | 55.4  | 34.02 | 0    |
| 40%                          | 13.07 | 51.92 | 35.01 | 0    |
| 50%                          | 10.06 | 42.72 | 47.22 | 0    |
| 60%                          | 0     | 0     | 72.9  | 27.1 |

**Figure S3.** XRD patterns of FLiBe eutectic salts with different  $\text{BeF}_2$  concentration at room temperature.

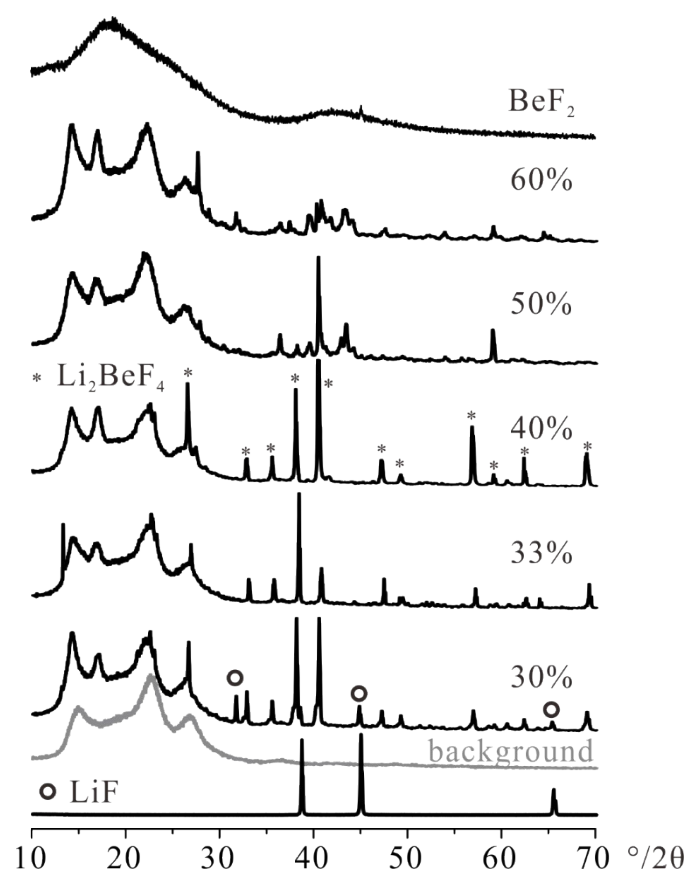

**Figure S4.** Solid-state  $^7\text{Li}$  MAS NMR spectra of FLiBe eutectic salts with different  $\text{BeF}_2$  concentration.

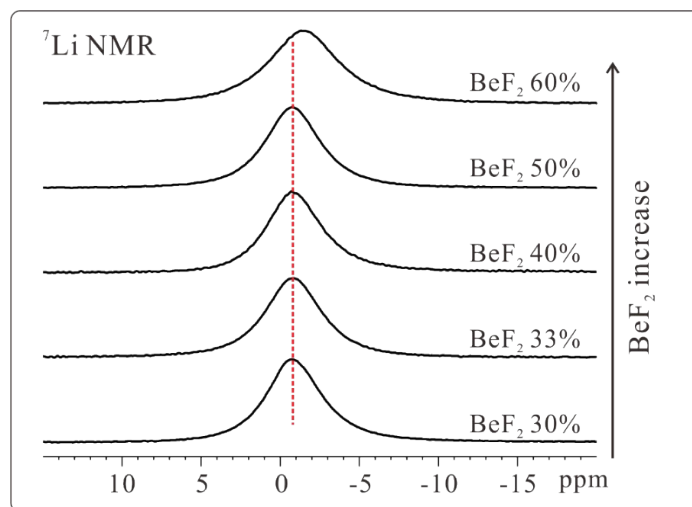

**Figure S5.** Calculated LiF-BeF<sub>2</sub> phase diagram. (J. Mol. Liq. 299, 112165 (2020).)

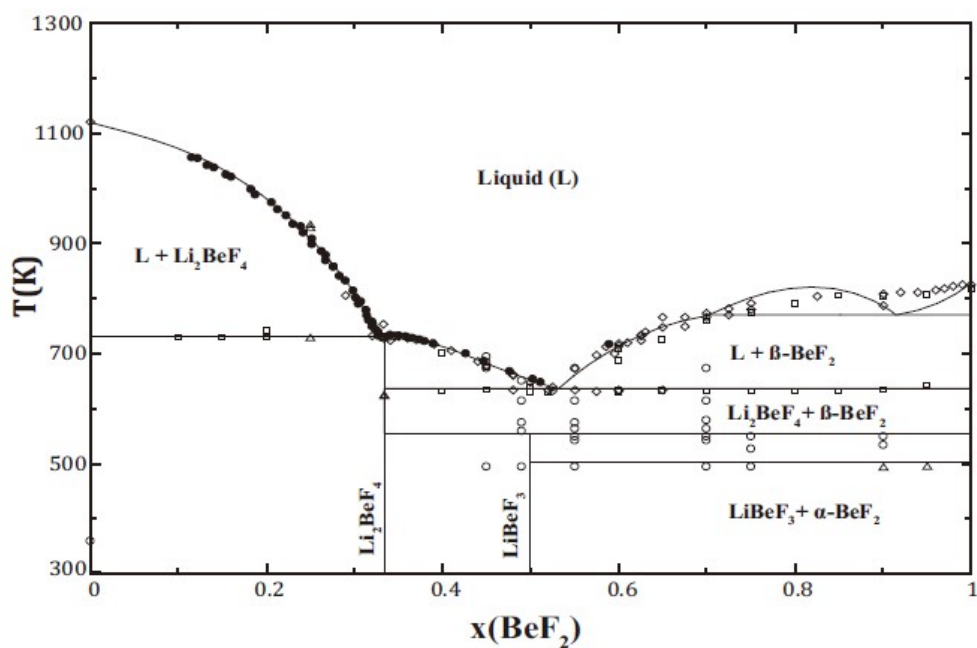

1, Smith, A. L., Capelli, E., Konings, R. J. M. & Gheribi, A. E. A new approach for coupled modelling of the structural and thermo-physical properties of molten salts. Case of a polymeric liquid LiF-BeF<sub>2</sub>. J. Mol. Liq. 299, 112165 (2020).

**Figure S6.** Illustration of the laser-heating high-temperature NMR system. Adapted from ref. 2 with permission from the American Chemical Society, Copyright 2021. (*J. Phys. Chem. C* **125**, 4704–4709 (2021))

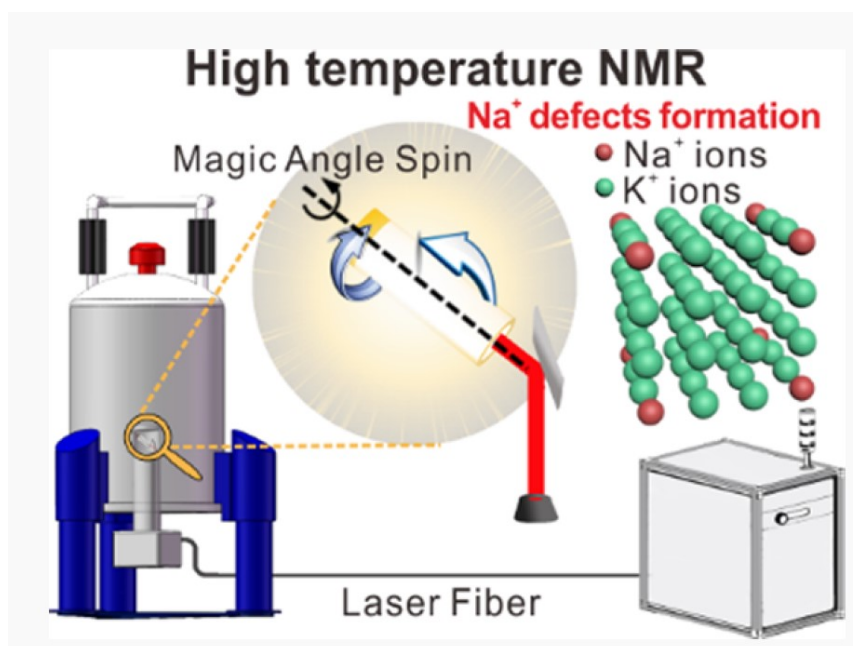

2, Liu, Y. et al. High-Temperature Magic-Angle Spin Nuclear Magnetic Resonance Reveals Sodium Ion-Doped Crystal-Phase Formation in FLiNaK Eutectic Salt Solidification. *J. Phys. Chem. C* **125**, 4704–4709 (2021).



**Figure S7.** High-temperature  $^{19}\text{F}$  NMR signal simulations and the calculated average chemical shifts.

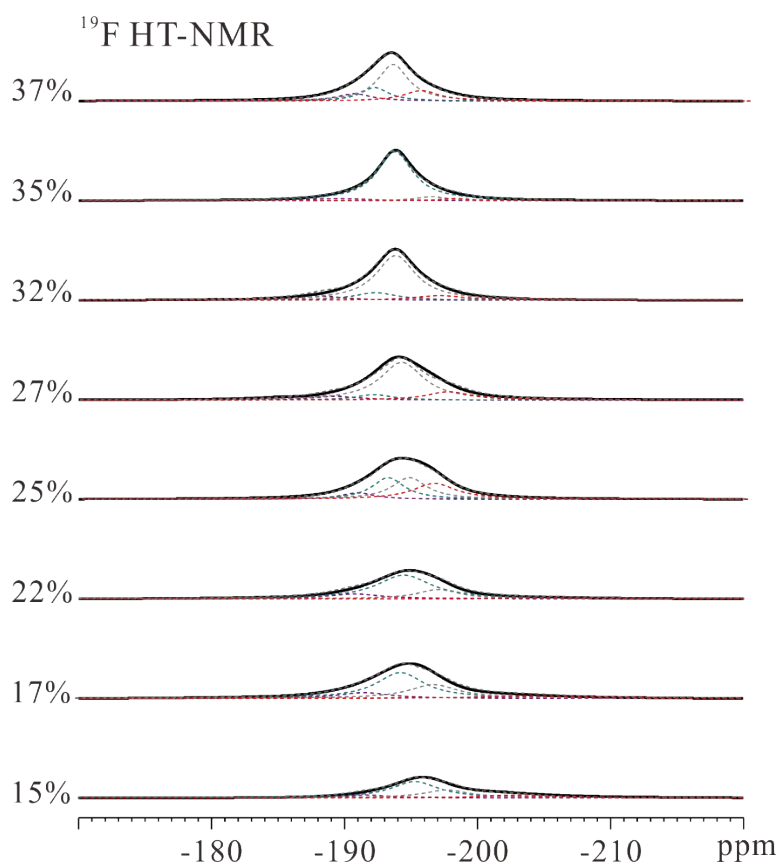

**Table S1.** Simulated  $^{19}\text{F}$  NMR signal chemical shifts.

| BeF <sub>2</sub> concentration | Sig. 1  | Sig. 2  | Sig.3   | Sig.4   |
|--------------------------------|---------|---------|---------|---------|
| 15                             | -192.42 | -195.37 | -197.28 | -201.01 |
| 17                             | -192.3  | -194.47 | -196.46 | -202.12 |
| 22                             | -191.5  | -194.49 | -196.55 | -204.07 |
| 25                             | -191.53 | -193.38 | -194.67 | -196.21 |
| 27                             | -190.53 | -192.45 | -193.83 | -196.17 |
| 32                             | -190.09 | -192.66 | -193.65 | -195.82 |
| 35                             | -191.09 | -193.74 | -195.46 | -196.62 |
| 37                             | -191.06 | -192.3  | -193.42 | -195.14 |

**Table S2.** Simulated  $^{19}\text{F}$  NMR signal integrals.

| BeF <sub>2</sub> concentration | Sig. 1 | Sig. 2 | Sig.3  | Sig.4  |
|--------------------------------|--------|--------|--------|--------|
| 15                             | 0.0879 | 0.5549 | 0.2595 | 0.0977 |
| 17                             | 0.1198 | 0.5085 | 0.2797 | 0.092  |
| 22                             | 0.1296 | 0.6435 | 0.192  | 0.0349 |
| 25                             | 0.0907 | 0.2966 | 0.3207 | 0.292  |
| 27                             | 0.082  | 0.0874 | 0.6736 | 0.157  |
| 32                             | 0.0674 | 0.128  | 0.7132 | 0.0915 |
| 35                             | 0.0595 | 0.855  | 0.0577 | 0.0277 |
| 37                             | 0.1208 | 0.1769 | 0.5271 | 0.1751 |

**Table S3.** Calculated  $^{19}\text{F}$  NMR signal averaged chemical shifts.

| BeF <sub>2</sub> concentration | Averaged chemical shift |
|--------------------------------|-------------------------|
| 15                             | -196.157                |
| 17                             | -195.47                 |
| 22                             | -194.832                |
| 25                             | -194.452                |
| 27                             | -193.806                |
| 32                             | -193.501                |
| 35                             | -193.742                |
| 37                             | -193.219                |

To obtain the chemical shifts accurately, signal simulation was performed on the  $^{19}\text{F}$  HT-NMR signals. The signal simulations were carried out by Dmfit.<sup>3</sup> The simulated chemical shifts and integrals were list in Table S1 and S2. The averaged chemical shift was calculated by the equation below:

$$\text{average chemical shift} = (\text{Sig. 1 integral}) * (\text{Sig. 1 chemical shift}) + (\text{Sig. 2 integral}) * (\text{Sig. 2 chemical shift}) + (\text{Sig. 3 integral}) * (\text{Sig. 3 chemical shift}) + (\text{Sig. 4 integral}) * (\text{Sig. 4 chemical shift})$$

The calculated chemical shifts were listed in Table S3.

3, D. Massiot, F. Fayon, M. Capron, et al., Modeling one and two-dimensional solid-state NMR spectra, *Magn. Reson. Chem.* **40** 70–76 (2002).

**Figure S8.** High-temperature  $^9\text{Be}$  NMR signal simulations and the calculated average chemical shifts.

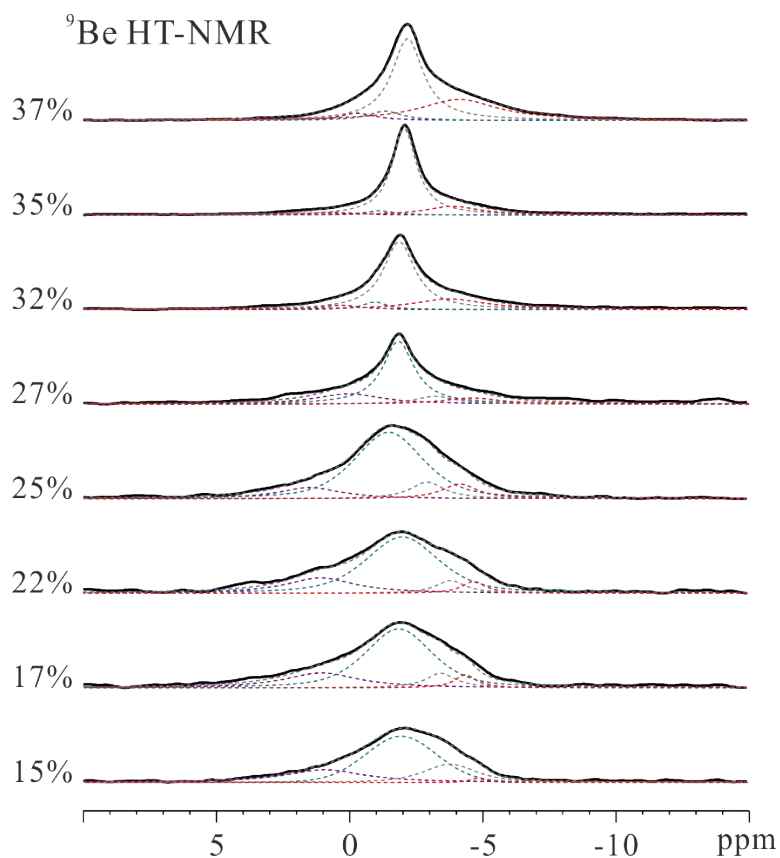

**Table S4.** Simulated  $^9\text{Be}$  NMR signal chemical shifts.

| BeF <sub>2</sub> concentration | Sig. 1 | Sig. 2 | Sig.3 | Sig.4 |
|--------------------------------|--------|--------|-------|-------|
| 15                             | 0.9    | -1.97  | -3.81 | -4.85 |
| 17                             | 1.03   | -1.9   | -3.51 | -4.44 |
| 22                             | 1.16   | -1.91  | -3.73 | -4.6  |
| 25                             | 1.42   | -1.57  | -3.02 | -4.25 |
| 27                             | 0.04   | -1.85  | -3.24 | -4.63 |
| 32                             | 0.3    | -0.99  | -1.91 | -3.81 |
| 35                             | 0.66   | -1.13  | -2.09 | -3.93 |
| 37                             | -0.25  | -1.31  | -2.16 | -4.09 |

**Table S5.** Simulated  $^9\text{Be}$  NMR signal integrals.

| $\text{BeF}_2$<br>concentration | Sig. 1 | Sig. 2 | Sig.3  | Sig.4  |
|---------------------------------|--------|--------|--------|--------|
| 15                              | 0.2394 | 0.5495 | 0.1975 | 0.0135 |
| 17                              | 0.2173 | 0.6403 | 0.0869 | 0.0555 |
| 22                              | 0.2087 | 0.6634 | 0.073  | 0.0549 |
| 25                              | 0.1272 | 0.6757 | 0.1019 | 0.0952 |
| 27                              | 0.2049 | 0.5922 | 0.0958 | 0.1071 |
| 32                              | 0.0499 | 0.0553 | 0.6593 | 0.2355 |
| 35                              | 0.0431 | 0.0435 | 0.7488 | 0.1645 |
| 37                              | 0.0526 | 0.0649 | 0.5399 | 0.3425 |

**Table S6.** Calculated  $^9\text{Be}$  NMR signal averaged chemical shifts.

| $\text{BeF}_2$<br>concentration | Averaged chemical shift |
|---------------------------------|-------------------------|
| 15                              | -1.68501                |
| 17                              | -1.54419                |
| 22                              | -1.54983                |
| 25                              | -1.59256                |
| 27                              | -1.89364                |
| 32                              | -2.1963                 |
| 35                              | -2.23219                |
| 37                              | -2.66518                |

The averaged  $^9\text{Be}$  chemical shift was also calculated using same method as  $^{19}\text{F}$  NMR signal.

**Figure S9.** DFT calculation results of  $^{19}\text{F}$  and  $^9\text{Be}$  NMR chemical shifts of different Be-F species.

Method: B3LYP/AVTZ

**$\text{BeF}_4^{2-}$  (Group Point : TD)**

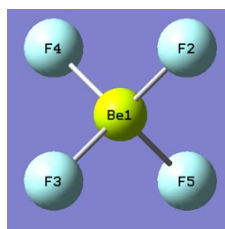

| Elem | Atoms   | Chemical shift (ppm) | Degeneracy |
|------|---------|----------------------|------------|
| Be   | 1       | -1.9184              | 1          |
| F    | 2,3,4,5 | -197.4373            | 4          |

**$\text{Be}_2\text{F}_7^{3-}$  (Group Point : D3D)**

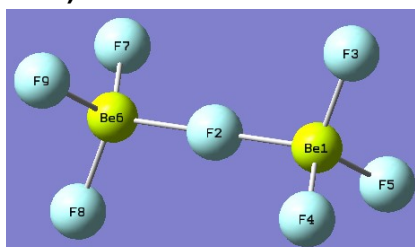

| Elem      | Atoms       | Chemical shift (ppm) | Degeneracy |
|-----------|-------------|----------------------|------------|
| Be        | 1,6         | -2.2788              | 2          |
| F         | 2           | -175.407             | 1          |
| F         | 3,8,4,5,7,9 | -194.87              | 6          |
| F average |             | -192.089             | 7          |

**$\text{Be}_3\text{F}_{10}^{4-}$  (Group Point : C2V)**

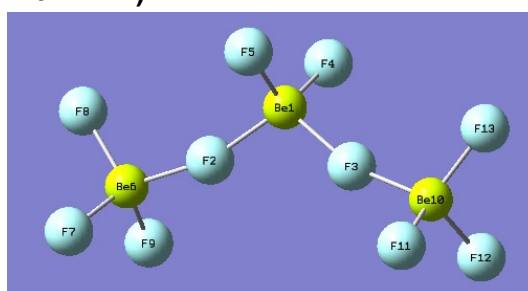

| Elem       | Atoms     | Chemical shift (ppm) | Degeneracy |
|------------|-----------|----------------------|------------|
| Be         | 6,10      | -2.2938              | 2          |
| Be         | 1         | -2.5235              | 1          |
| F          | 2,3       | -175.761             | 2          |
| F          | 4,5       | -191.471             | 2          |
| F          | 7,9,11,12 | -193.214             | 4          |
| F          | 8,13      | -195.101             | 2          |
| Be average |           | -2.3704              | 3          |
| F average  |           | -189.752             | 10         |

**Be<sub>4</sub>F<sub>13</sub><sup>5-</sup> (Group Point : C<sub>2h</sub>)**

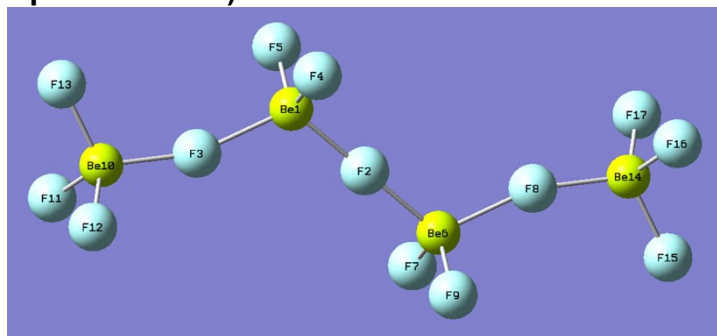

| Elem      | Atoms       | Shielding (ppm) | Degeneracy |
|-----------|-------------|-----------------|------------|
| Be        | 10,14,1,6   | -2.3769         | 4          |
| F         | 2           | -172.773        | 1          |
| F         | 3,8         | -177.843        | 2          |
| F         | 4,5,7,9     | -188.842        | 4          |
| F         | 11,12,16,17 | -191.737        | 4          |
| F         | 13,15       | -194.619        | 2          |
| F average |             | -187.693        | 13         |

**Figure S10.** Calculated  $^{19}\text{F}$  and  $^9\text{Be}$  NMR chemical shift evolution plots.

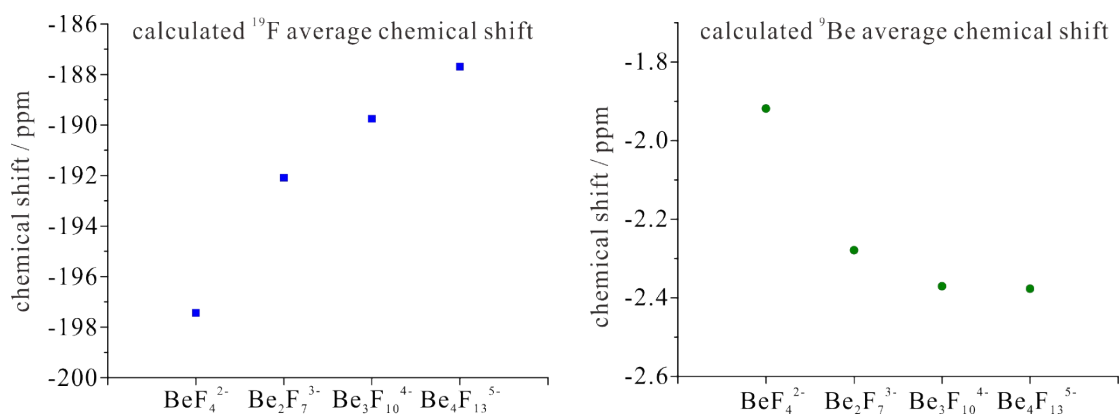

Supplement: d3cp01096a1.pdf [file d3cp01096a1.pdf]
